# Supplementary material for: Reference-Based Restriction-Site-Associated DNA Sequencing Data Are Useful for Species Delineation in a Recently Diverged Asexually Reproducing Species Complex (Parmeliaceae, Ascomycota)
Source: MDPI journal article supplement (doi:10.3390/jof9121180), 2023-12-09
Supplement: s1 [file s1]

| Sample Name | Species                                                                                           | NCBI SRA accession |
|-------------|---------------------------------------------------------------------------------------------------|--------------------|
| Pa_16634    | Parmelina atricha: France: Pyrenees MAF-Lich 16634                                                | SRR26887223        |
| Pa_17559    | Parmelina atricha: France: Pyrenees MAF-Lich 17559                                                | SRR26887222        |
| Pa_16633    | Parmelina atricha: Spain: Gerona MAF Lich 16633                                                   | SRR26887211        |
| Pa_17558    | Parmelina atricha: Spain: Gerona MAF-Lich 17558                                                   | SRR26887200        |
| Pa_4393     | Parmelina atricha: Spain: Gerona, Coll. No. 6121C (DNA code 4393)                                 | SRR26887189        |
| Pc_4375     | Parmelina carporrhizans: Spain: Canary is. Tenerife, Crespo et al. 14-3-2014, DNA code 4375       | SRR26887178        |
| Pc_3690     | Parmelina carporrhizans: Spain: Canary is. Tenerife, Crespo et al. 23-6-2009, DNA code 3690       | SRR26887167        |
| Pc_4371     | Parmelina carporrhizans: Spain: Canary is. Tenerife, Crespo et al. 14-3-2014, DNA code 4371       | SRR26887156        |
| Pc_4101     | Parmelina carporrhizans: Morocco: Close to Beni-Hassan, Alors & Boluda. 21-10-2013, DNA code 4101 | SRR26887145        |
| Pc_2017     | Parmelina carporrhizans: Spain: Cadiz, Crespo et al. 18-10-2017, Coll. No. 5                      | SRR26887134        |
| Pp_17515    | Parmelina pastillifera: Turkey: Canakkale, MAF-Lich 17515                                         | SRR26887221        |
| Pp_16471    | Parmelina pastillifera: Turkey: Canakkale, MAF-Lich 16471                                         | SRR26887220        |
| Pp_20410    | Parmelina pastillifera: Armenia: Tavush Prov., MAF-Lich 20410                                     | SRR26887219        |
| Pp_17507    | Parmelina pastillifera: Germany: Bad Reichenhall, MAF-Lich 17507                                  | SRR26887218        |
| Pp_2015     | Parmelina pastillifera: Spain: Caceres, Crespo et al. 23-11-2015                                  | SRR26887217        |
| Pp_17533    | Parmelina pastillifera: UK: Wales, MAF-Lich 17533                                                 | SRR26887216        |
| Pp_17532    | Parmelina pastillifera: UK: Wales, MAF Lich 17532                                                 | SRR26887215        |
| Pp_16473    | Parmelina pastillifera: Spain: Cantabria. MAF-Lich 16473                                          | SRR26887214        |
| Pp_17508    | Parmelina pastillifera: Germany: Bad Reichenhall, MAF-Lich 17508                                  | SRR26887213        |
| Pp_17547    | Parmelina pastillifera: Norway: Nordaland, MAF-Lich 17547                                         | SRR26887212        |
| Pp_17541    | Parmelina pastillifera: Norway: Nordaland, MAF-Lich 17541                                         | SRR26887210        |
| Pp_17540    | Parmelina pastillifera: Norway: Nordaland, MAF-Lich 17540                                         | SRR26887209        |
| Pp_17545    | Parmelina pastillifera: Norway: Nordaland, MAF-Lich 17545                                         | SRR26887208        |
| Pp_17544    | Parmelina pastillifera: Norway: Nordaland, MAF-Lich 17544                                         | SRR26887207        |
| Pp_17482    | Parmelina pastillifera: Italy: Friuli-Venezia, MAF-Lich 17482                                     | SRR26887206        |
| Pp_17465    | Parmelina pastillifera: Italy: Friuli-Venezia, MAF-Lich 17465                                     | SRR26887205        |
| Pp_17464    | Parmelina pastillifera: Italy: Friuli-Venezia, MAF Lich 17464                                     | SRR26887204        |
| Pp_17466    | Parmelina pastillifera: Italy: Friuli-Venezia, MAF Lich 17466                                     | SRR26887203        |
| Pp_17469    | Parmelina pastillifera: Italy: Friuli-Venezia, MAF Lich 17469                                     | SRR26887202        |
| Pp_17472    | Parmelina pastillifera: Italy: Friuli-Venezia, MAF Lich 17472                                     | SRR26887201        |
| Pp_17471    | Parmelina pastillifera: Italy: Friuli-Venezia, MAF-Lich 17471                                     | SRR26887199        |
| Pp_17470    | Parmelina pastillifera: Italy: Friuli-Venezia, MAF-Lich 17470                                     | SRR26887198        |
| Pp_17468    | Parmelina pastillifera: Italy: Friuli-Venezia, MAF-Lich 17468                                     | SRR26887197        |
| Pp_17473    | Parmelina pastillifera: Italy: Friuli-Venezia, MAF-Lich 17473                                     | SRR26887196        |
| Pp_17451    | Parmelina pastillifera: Italy: Toscana, MAF-Lich 17451                                            | SRR26887195        |
| Pp_17453    | Parmelina pastillifera: Italy: Toscana, MAF-Lich 17453                                            | SRR26887194        |
| Pp_17454    | Parmelina pastillifera: Italy: Toscana, MAF-Lich 17454                                            | SRR26887193        |

|          |                                                                                       |             |
|----------|---------------------------------------------------------------------------------------|-------------|
| Pp_17452 | Parmelina pastillifera: Italy: Toscana, MAF-Lich 17452                                | SRR26887192 |
| Pp_19537 | Parmelina pastillifera: Portugal: Minho, MAF-Lich 19537                               | SRR26887191 |
| Pp_19501 | Parmelina pastillifera: Portugal: Minho, MAF-Lich 19501                               | SRR26887190 |
| Pp_17386 | Parmelina pastillifera: Spain: Navarra, MAF-Lich 17386                                | SRR26887188 |
| Pp_17385 | Parmelina pastillifera: Spain: Navarra, MAF-Lich 17385                                | SRR26887187 |
| Pp_18341 | Parmelina pastillifera: Spain: Navarra, MAF-Lich 18341                                | SRR26887186 |
| Pp_17384 | Parmelina pastillifera: Spain: Navarra, MAF-Lich 17384                                | SRR26887185 |
| Pp_19654 | Parmelina pastillifera: Austria: Oberosterreich, MAF-Lich 19654                       | SRR26887184 |
| Pt_7197  | Parmelina tiliacea: Spain: Cadiz, Crespo et al. 19-10-2017 coll. No. 7, DNA code 7197 | SRR26887183 |
| Pt_7198  | Parmelina tiliacea: Spain: Cadiz, Crespo et al. 19-10-2017 coll. No. 8, DNA code 7198 | SRR26887182 |
| Pt_17531 | Parmelina tiliacea: UK: Wales, MAF-Lich 17531                                         | SRR26887181 |
| Pt_17530 | Parmelina tiliacea: UK: Wales, MAF-Lich 17530                                         | SRR26887180 |
| Pt_17538 | Parmelina tiliacea: UK: Cumbria, MAF-Lich 17538                                       | SRR26887179 |
| Pt_17535 | Parmelina tiliacea: UK: Cumbria, MAF-Lich 17535                                       | SRR26887177 |
| Pt_17526 | Parmelina tiliacea: Turkey: Eskisehir MAF-Lich 17526                                  | SRR26887176 |
| Pt_17524 | Parmelina tiliacea: Turkey: Eskisehir MAF-Lich 17524                                  | SRR26887175 |
| Pt_17522 | Parmelina tiliacea: Turkey: Eskisehir MAF-Lich 17522                                  | SRR26887174 |
| Pt_19379 | Parmelina tiliacea: Iran: Azarbaijan, MAF-Lich 19379                                  | SRR26887173 |
| Pt_19378 | Parmelina tiliacea: Iran: Azarbaijan, MAF-Lich 19378                                  | SRR26887172 |
| Pt_17485 | Parmelina tiliacea: Slovenia: Bled, MAF-Lich 17485                                    | SRR26887171 |
| Pt_17484 | Parmelina tiliacea: Slovenia: Bled, MAF-Lich 17484                                    | SRR26887170 |
| Pt_17481 | Parmelina tiliacea: Italy: Friuli-Venezia, MAF-Lich 17481                             | SRR26887169 |
| Pt_17479 | Parmelina tiliacea: Italy: Friuli-Venezia, MAF-Lich 17479                             | SRR26887168 |
| Pt_17477 | Parmelina tiliacea: Italy: Friuli-Venezia, MAF-Lich 17477                             | SRR26887166 |
| Pt_19206 | Parmelina tiliacea: Italy: Sicilia, MAF-Lich 19206                                    | SRR26887165 |
| Pt_17450 | Parmelina tiliacea: Italy: Toscana, MAF-Lich 17450                                    | SRR26887164 |
| Pt_17447 | Parmelina tiliacea: Italy: Toscana, MAF-Lich 17447                                    | SRR26887163 |
| Pt_17443 | Parmelina tiliacea: Italy: Toscana, MAF-Lich 17443                                    | SRR26887162 |
| Pt_17304 | Parmelina tiliacea: Morocco: Ifrane, MAF-Lich 17304                                   | SRR26887161 |
| Pt_17298 | Parmelina tiliacea: Morocco: Ifrane, MAF-Lich 17298                                   | SRR26887160 |
| Pt_17303 | Parmelina tiliacea: Morocco: Ifrane, MAF-Lich 17303                                   | SRR26887159 |
| Pt_17294 | Parmelina tiliacea: Spain: Canary Is, Gran Canaria, MAF-Lich 17294                    | SRR26887158 |
| Pt_17242 | Parmelina tiliacea: Spain: Canary Is, Tenerife, MAF-Lich 17242                        | SRR26887157 |
| Pt_17232 | Parmelina tiliacea: Spain: Canary Is, La Palma, MAF-Lich 17232                        | SRR26887155 |
| Pt_17256 | Parmelina tiliacea: Spain: Canary Is, Tenerfie, MAF-Lich 17256                        | SRR26887154 |
| Pt_17257 | Parmelina tiliacea: Spain: Canary Is, Tenerfie, MAF-Lich 17257                        | SRR26887153 |
| Pt_17340 | Parmelina tiliacea: Spain: Caceres, MAF-Lich 17340                                    | SRR26887152 |
| Pt_17337 | Parmelina tiliacea: Spain: Caceres, MAF-Lich 17337                                    | SRR26887151 |
| Pt_17553 | Parmelina tiliacea: Sweden: Uppland, MAF-Lich 17553                                   | SRR26887150 |

|          |                                                                      |             |
|----------|----------------------------------------------------------------------|-------------|
| Pt_17551 | Parmelina tiliacea: Sweden: Uppland, MAF-Lich 17551                  | SRR26887149 |
| Pt_17550 | Parmelina tiliacea: Sweden: Uppland, MAF-Lich 17550                  | SRR26887148 |
| Pt_20278 | Parmelina tiliacea: Armenia: Ararat Prov., MAF-Lich 20278            | SRR26887147 |
| Pt_20424 | Parmelina tiliacea: Armenia: Tavush Prov., MAF-Lich 20424            | SRR26887146 |
| Pt_17497 | Parmelina tiliacea: Austria: Salzburg, MAF-Lich 17497                | SRR26887144 |
| Pt_17495 | Parmelina tiliacea: Austria: Salzburg, MAF-Lich 17495                | SRR26887143 |
| Pt_17494 | Parmelina tiliacea: Austria: Salzburg, MAF-Lich 17494                | SRR26887142 |
| Pt_16485 | Parmelina tiliacea: Germany: Bavaria, MAF-Lich 16485 (Epitypus)      | SRR26887141 |
| Pt_17512 | Parmelina tiliacea: Germany: Bavaria, MAF-Lich 17512                 | SRR26887140 |
| Pt_17511 | Parmelina tiliacea: Germany: Bavaria, MAF-Lich 17511                 | SRR26887139 |
| Pt_17510 | Parmelina tiliacea: Germany: Bavaria, MAF-Lich 17510                 | SRR26887138 |
| Pt_17504 | Parmelina tiliacea: Germany: Bad Reichenhall, MAF-Lich 17504         | SRR26887137 |
| Pt_17501 | Parmelina tiliacea: Germany: Bad Reichenhall, MAF-Lich 17501         | SRR26887136 |
| Pt_17407 | Parmelina tiliacea: Tunisia: Gobernacion de Jendouba, MAF-Lich 17407 | SRR26887135 |
| Pt_17429 | Parmelina tiliacea: Switzerland: Neuchatel, MAF-Lich 17429           | SRR26887133 |
| Pt_17427 | Parmelina tiliacea: Switzerland: Neuchatel, MAF-Lich 17427           | SRR26887132 |
| Pt_17406 | Parmelina tiliacea: Spain: Mallorca, MAF-Lich 17406                  | SRR26887131 |
| Pt_17401 | Parmelina tiliacea: Spain: Mallorca, MAF-Lich 17401                  | SRR26887130 |
| Pt_17403 | Parmelina tiliacea: Spain: Mallorca, MAF-Lich 17403                  | SRR26887129 |
