# Supplementary material for: Reference-Based Restriction-Site-Associated DNA Sequencing Data Are Useful for Species Delineation in a Recently Diverged Asexually Reproducing Species Complex (Parmeliaceae, Ascomycota)
Source: MDPI journal article supplement (doi:10.3390/jof9121180), 2023-12-09
Supplement: s1 [file s1]

## **Phylogenomic analyses**

### **#Model test**

```
modeltest-ng -i ~/pamelina5/subdata2_outfiles/subdata2.snps -d nt -output  
./modeltest.output -p 10 -a stamatakis -h g -T RAxML
```

### **#Raxml with BS**

```
raxmlHPC -s ~/pamelina5/subdata2_outfiles/subdata2.snps -n pamelinap5 -m GTRCATX --  
asc-corr=lewis -f a -x 3546564 -p 654683 -# 1000 -T 15
```

## **Analysis of population structure**

### **#filtered vcf for all SNPs with a minor allele frequency (MAF) greater than or equal to 0.05 and a minimum coverage of 50%**

```
vcftools --vcf ~/pamelina5/subdata4_outfiles/subdata4.vcf --max-missing 0.5 --maf 0.05 --out  
Parmelina2.vcftools.vcf --recode
```

### **#Required packages**

```
library(vcfR)  
library(adeigenet)  
library(hierfstat)  
library(qqman)  
library(mmod)
```

### **#Loading vcf file into R genind object**

```
vcf <- read.vcfR("~/Parmelina2.vcftools.vcf.recode.vcf")  
data.genlight <- vcfR2genlight(vcf, n.cores = 10)  
pop.file <- read.table("~/Parmelina2a.pop", header=F)  
pop(data.genlight) <- pop.file[,2]  
data.genind <- df2genind(as.data.frame(data.genlight), pop=pop(data.genlight), ploidy=1,  
ind.names=indNames(data.genlight), loc.names=locNames(data.genlight))  
data.genind
```

### **#Pairwise Fst**

```
pwGstN <- pairwise_Gst_Nei(data.genind)  
pwGstH <- pairwise_Gst_Hedrick(data.genind)  
pwGstN  
pwGstH  
obj_seplocus <- seploc(data.genind);
```

### **#Calculation of Gst Nei**

```
obj_pwGst <- lapply(obj_seplocus, pairwise_Gst_Nei);  
obj_pairwiseGstnum <- sapply(obj_pwGst, as.numeric);  
obj_pairwiseGstnum[obj_pairwiseGstnum<0] <- 0;
```

### **#Calculation of Gst Hedrick**

```
obj_pwGstH <- lapply(obj_seplocus, pairwise_Gst_Hedrick);  
obj_pairwiseGstHnum <- sapply(obj_pwGstH, as.numeric);  
obj_pairwiseGstHnum[obj_pairwiseGstHnum<0] <- 0;
```

### **#DAPC**

```
dapcl <- dapc(data.genind, n.pca = 60, n.da = 2)  
mycol <- c('red','darkblue','darkgreen','gold');
```

### **#print DAPC**

```
scatter(dapcl, scree.pca = TRUE, posi.pca = "bottomleft", scree.da=TRUE,  
posi.da="bottomright", bg="white", pch=17:22, cell=5, cstar=1, col=mycol, solid= 0.8, cex=1,  
clab=0, leg=TRUE, txt.leg=paste("Clades",1:4))  
compoplot(dapcl, posi='bottomright', ncol = 1, col = mycol, cleg = 0.8, cex.names = 0.4)
```

### **#Convert the .alleles matrix from ipyrad and exclude loci with less than 4 samples**

```
python finerad_input.py --input ~/pamelina5/subdata4_outfiles/subdata4.alleles --minsample 4
```

### **#RADpainter. Calculate the co-ancestry matrix**

```
./RADpainter paint ~/pamelina5/subdata4_outfiles/subdata4.alleles.min4.finerad
```

### **#fineStructure. Assign individuals to populations**

```
./finestructure -x 100000 -y 100000 -z 1000  
~/pamelina5/subdata4_outfiles/subdata4.alleles.min4._chunks.out  
~/pamelina5/subdata4_outfiles/subdata4.alleles.min4.mcmc.xml
```

### **#fineStructure. Tree building**

```
./finestructure -m T -x 10000 ~/pamelina5/subdata4_outfiles/subdata4.alleles.min4._chunks.out  
~/pamelina5/subdata4_outfiles/subdata4.alleles.min4.mcmc.xml  
~/pamelina5/subdata4_outfiles/subdata4.alleles.min4.mcmcTree.xml
```

### **#fineRADestructurePlot.R for visualization**

### **#AMOVA-Required packages**

```
library(vcfR)  
library(adegenet)  
library(poppr)  
library(ape)
```

### **#Read the data as a genind object**

```
vcf <- read.vcfR("~/Parmelina2.vcftools.vcf.recode.vcf")  
data.genlight <- vcfR2genlight(vcf, n.cores = 10)  
pop.file <- read.table("~/Parmelina2a.pop", header=F)  
pop(data.genlight) <- pop.file[,2]
```

```
data.genind <- df2genind(as.data.frame(data.genlight), pop=pop(data.genlight), ploidy=1,  
ind.names=indNames(data.genlight), loc.names=locNames(data.genlight))  
data.genind
```

```
parmelinatable2 = read.table('~/.parmelina1_strata.txt', header=T)  
strata(data.genind) <- parmelinatable2  
data.genind
```

#### **#Read hierarchy file**

```
hier(data.genind) <- ~Pop  
data.genind
```

#### **# AMOVA functions**

```
parmelinamova = poppr.amova(data.genind, ~Pop)  
parmelinamova  
parmelinamova.test = randtest(parmelinamova, nrepet = 999)  
str(parmelinamova.test)
```
